# Supplementary material for: TooManyPeaks identifies drug-resistant-specific regulatory elements from single-cell leukemic epigenomes
Source: PubMed Central journal article supplement — Cell Rep. Author manuscript; Available in PMC 2021 Sep 1. (PMC8409102; doi:10.1016/j.celrep.2021.109575), 2021-08-24
Supplement: NIHMS1735646-supplement-1.pdf [file NIHMS1735646-supplement-1.pdf]

**Cell Reports, Volume 36**

**Supplemental information**

**TooManyPeaks identifies  
drug-resistant-specific regulatory elements  
from single-cell leukemic epigenomes**

**Gregory W. Schwartz, Yeqiao Zhou, Jelena Petrovic, Warren S. Pear, and Robert B. Faryabi**

**Figure S1**

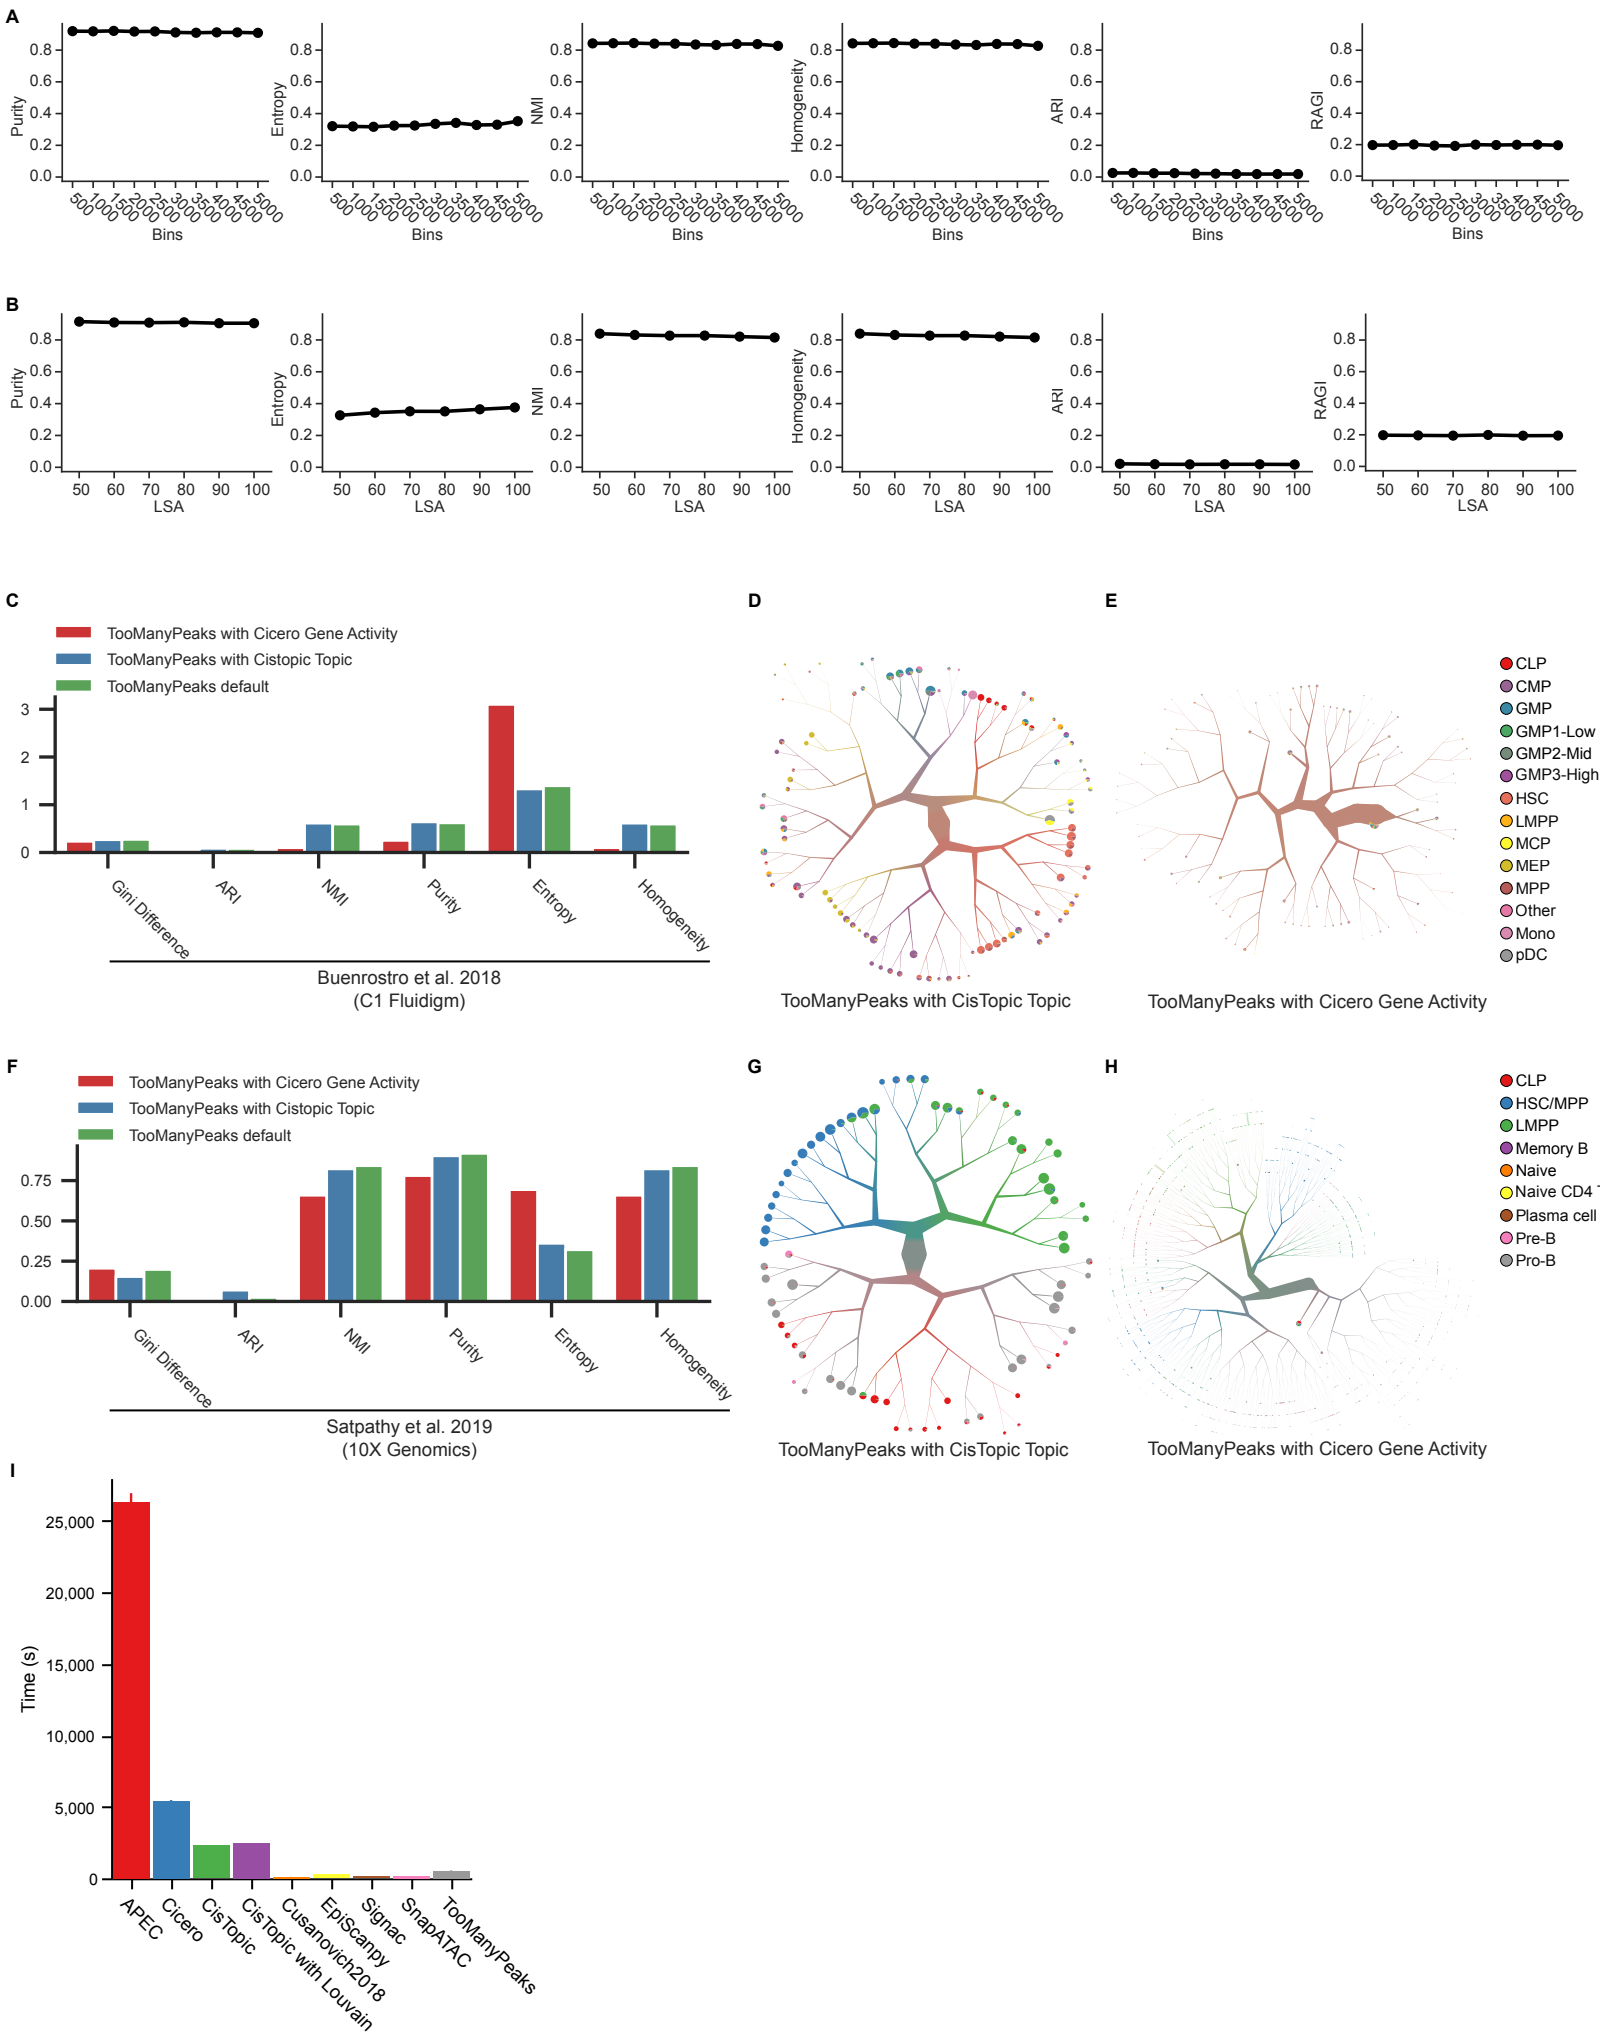

Figure S1: Comparison of TooManyPeaks for varying parameters, feature definition algorithms, and timing. **(A-B)** Comparison of TooManyPeaks across varying parameters on a human peripheral blood cell population ( $n = 44,814$  cells) (Satpathy et al., 2019). Performance was measured using a clustering benchmark with, from left to right, lower entropy, higher purity, higher normalized mutual information (NMI), higher adjusted Rand index (ARI), and higher homogeneity showing more accurate clustering by varying either the number of bins (A) or the number of LSA dimensions (B). **(C-H)** Running TooManyPeaks using features defined from other scATAC-seq algorithms. (C, F) Clustering benchmark quantification from either the tree generated using CisTopic (D, G) or Cicero (E, H) on CD34<sup>+</sup> hematopoietic progenitor cells profiled using 10x Genomics ( $n = 7,771$  cells) (Satpathy et al., 2019) (C-E), or Fluidigm C1 ( $n = 2,954$  cells) (Buenrostro et al., 2018) (F-H). **(I)** Timing benchmark of scATAC-seq algorithms. Running time of algorithms were compared using a human bone marrow profiled with Fluidigm C1 ( $n = 2,954$  cells) (Buenrostro et al., 2018). Bar plots (mean plus / minus standard error) quantifies timing for 3 independent runs using a machine with Ubuntu 20.04, 512GiB Memory, Intel<sup>®</sup> Xeon<sup>®</sup> CPU E5-2670 v3 @ 2.30GHz, 2 physical processors 24 cores, and 48 threads. For an unbiased comparison, default or suggested filterings and parameters were used for all algorithms unless otherwise noted (see STAR Methods). Related to Figure 1.

Figure S2

- B cell
- Dendritic cell
- Epithelial cell
- Macrophage
- Monocyte
- NK cell
- Neutrophil
- Other
- Stem cell
- Stromal cell
- T cell

Full Tree (modularity stopping criteria)

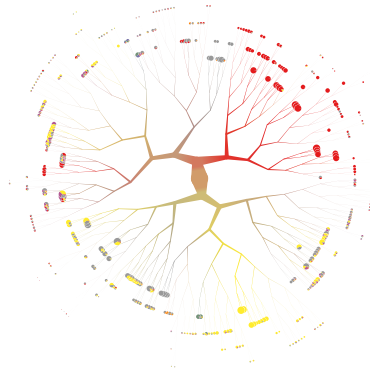

Increasing MADs  
(decreased pruning)

Modularity-guided pruning  
median(modularity)

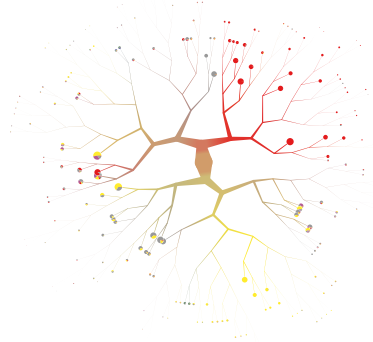

Modularity-guided pruning  
median(modularity) + 5 • MAD(modularity)

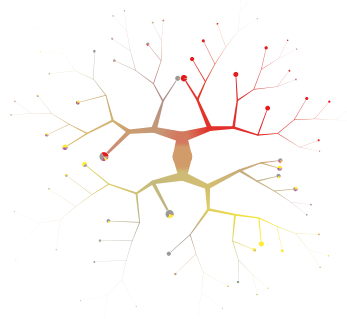

Modularity-guided pruning  
median(modularity) + 10 • MAD(modularity)

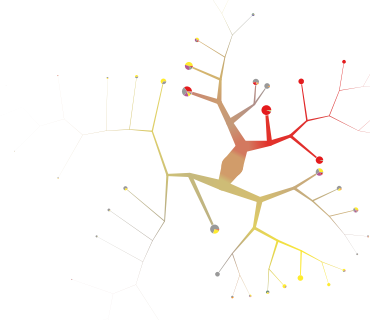

Modularity-guided pruning  
median(modularity) + 15 • MAD(modularity)

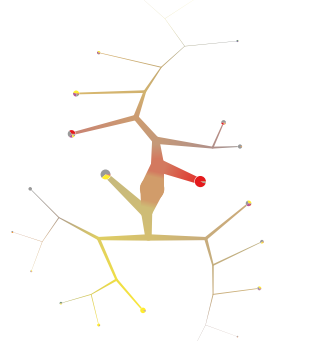

Figure S2: TooManyPeaks provides a number of pruning options, including a modularity-guided pruning, to control the tree depth (Schwartz et al., 2020). Example of controlling the depth of the TooManyPeaks tree with modularity stopping criteria of mouse spleen and bone marrow cells with modularity-guided pruning when the threshold is set to no pruning or median(modularity) plus 0, 5, 10, and  $15 \times \text{MAD}(\text{modularity})$  (from top to bottom in that order). MAD: median absolute deviations. Related to Figure 2.

Figure S3

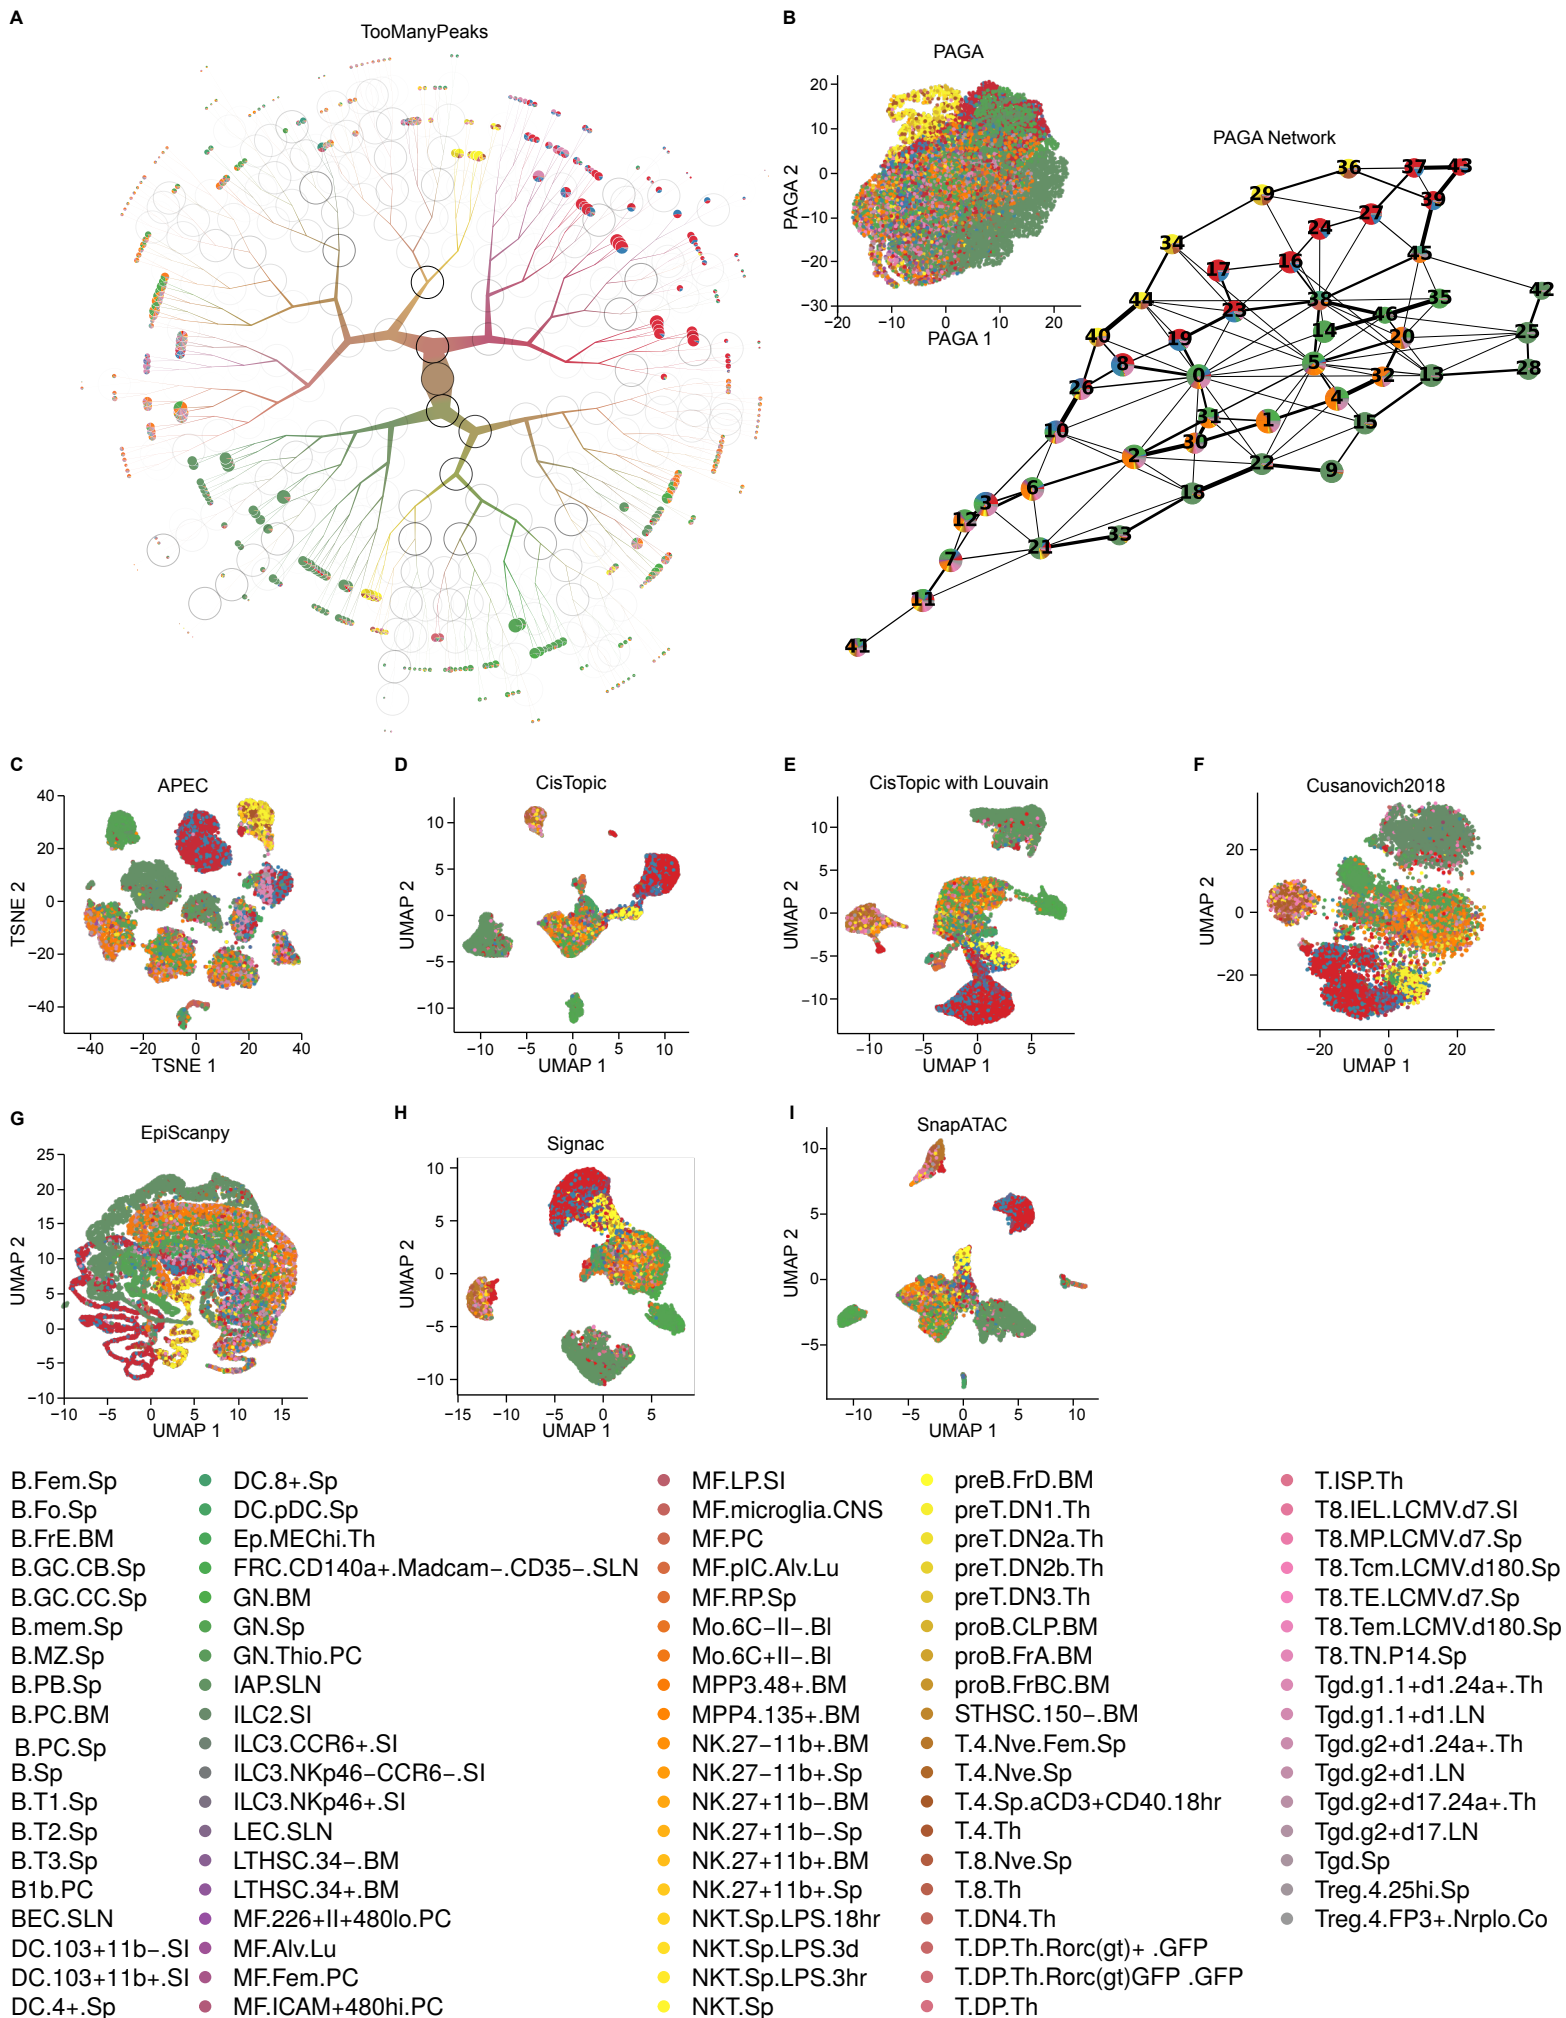

Figure S3: Stratification and annotation of murine marrow and spleen cells. The TooManyPeaks algorithm for cell-type annotation based on reference cis-regulatory elements was used to predict cell lineages in mouse bone marrow and spleen ( $n = 16,749$  cells) (Cusanovich et al., 2018). Reference cis-regulatory elements of 92 phenotypically defined progenitor and differentiated hematopoietic cell types are generated from the analyses of bulk ATAC-seq in FACS-sorted cells (Yoshida et al., 2019). **(A)** TooManyPeaks with modularity stopping criteria and no pruning shows all 92 progenitor and differentiated hematopoietic cell types. At each bipartitioning, darker circle circumference represents higher modularity. **(B-I)** PAGA-initiated UMAP (B, left panel) or PAGA network (B, right panel), t-SNE output of APEC (C), as well as UMAP outputs of CisTopic (D), CisTopic with Louvain (E), Cusanovich2018 (F), EpiScanpy (G), Signac (H), and SnapATAC (I) are colored by assigned cell-type labels. For an unbiased comparison, each projection used the corresponding package's UMAP or t-SNE implementation. Related to Figure 2.

**Figure S4**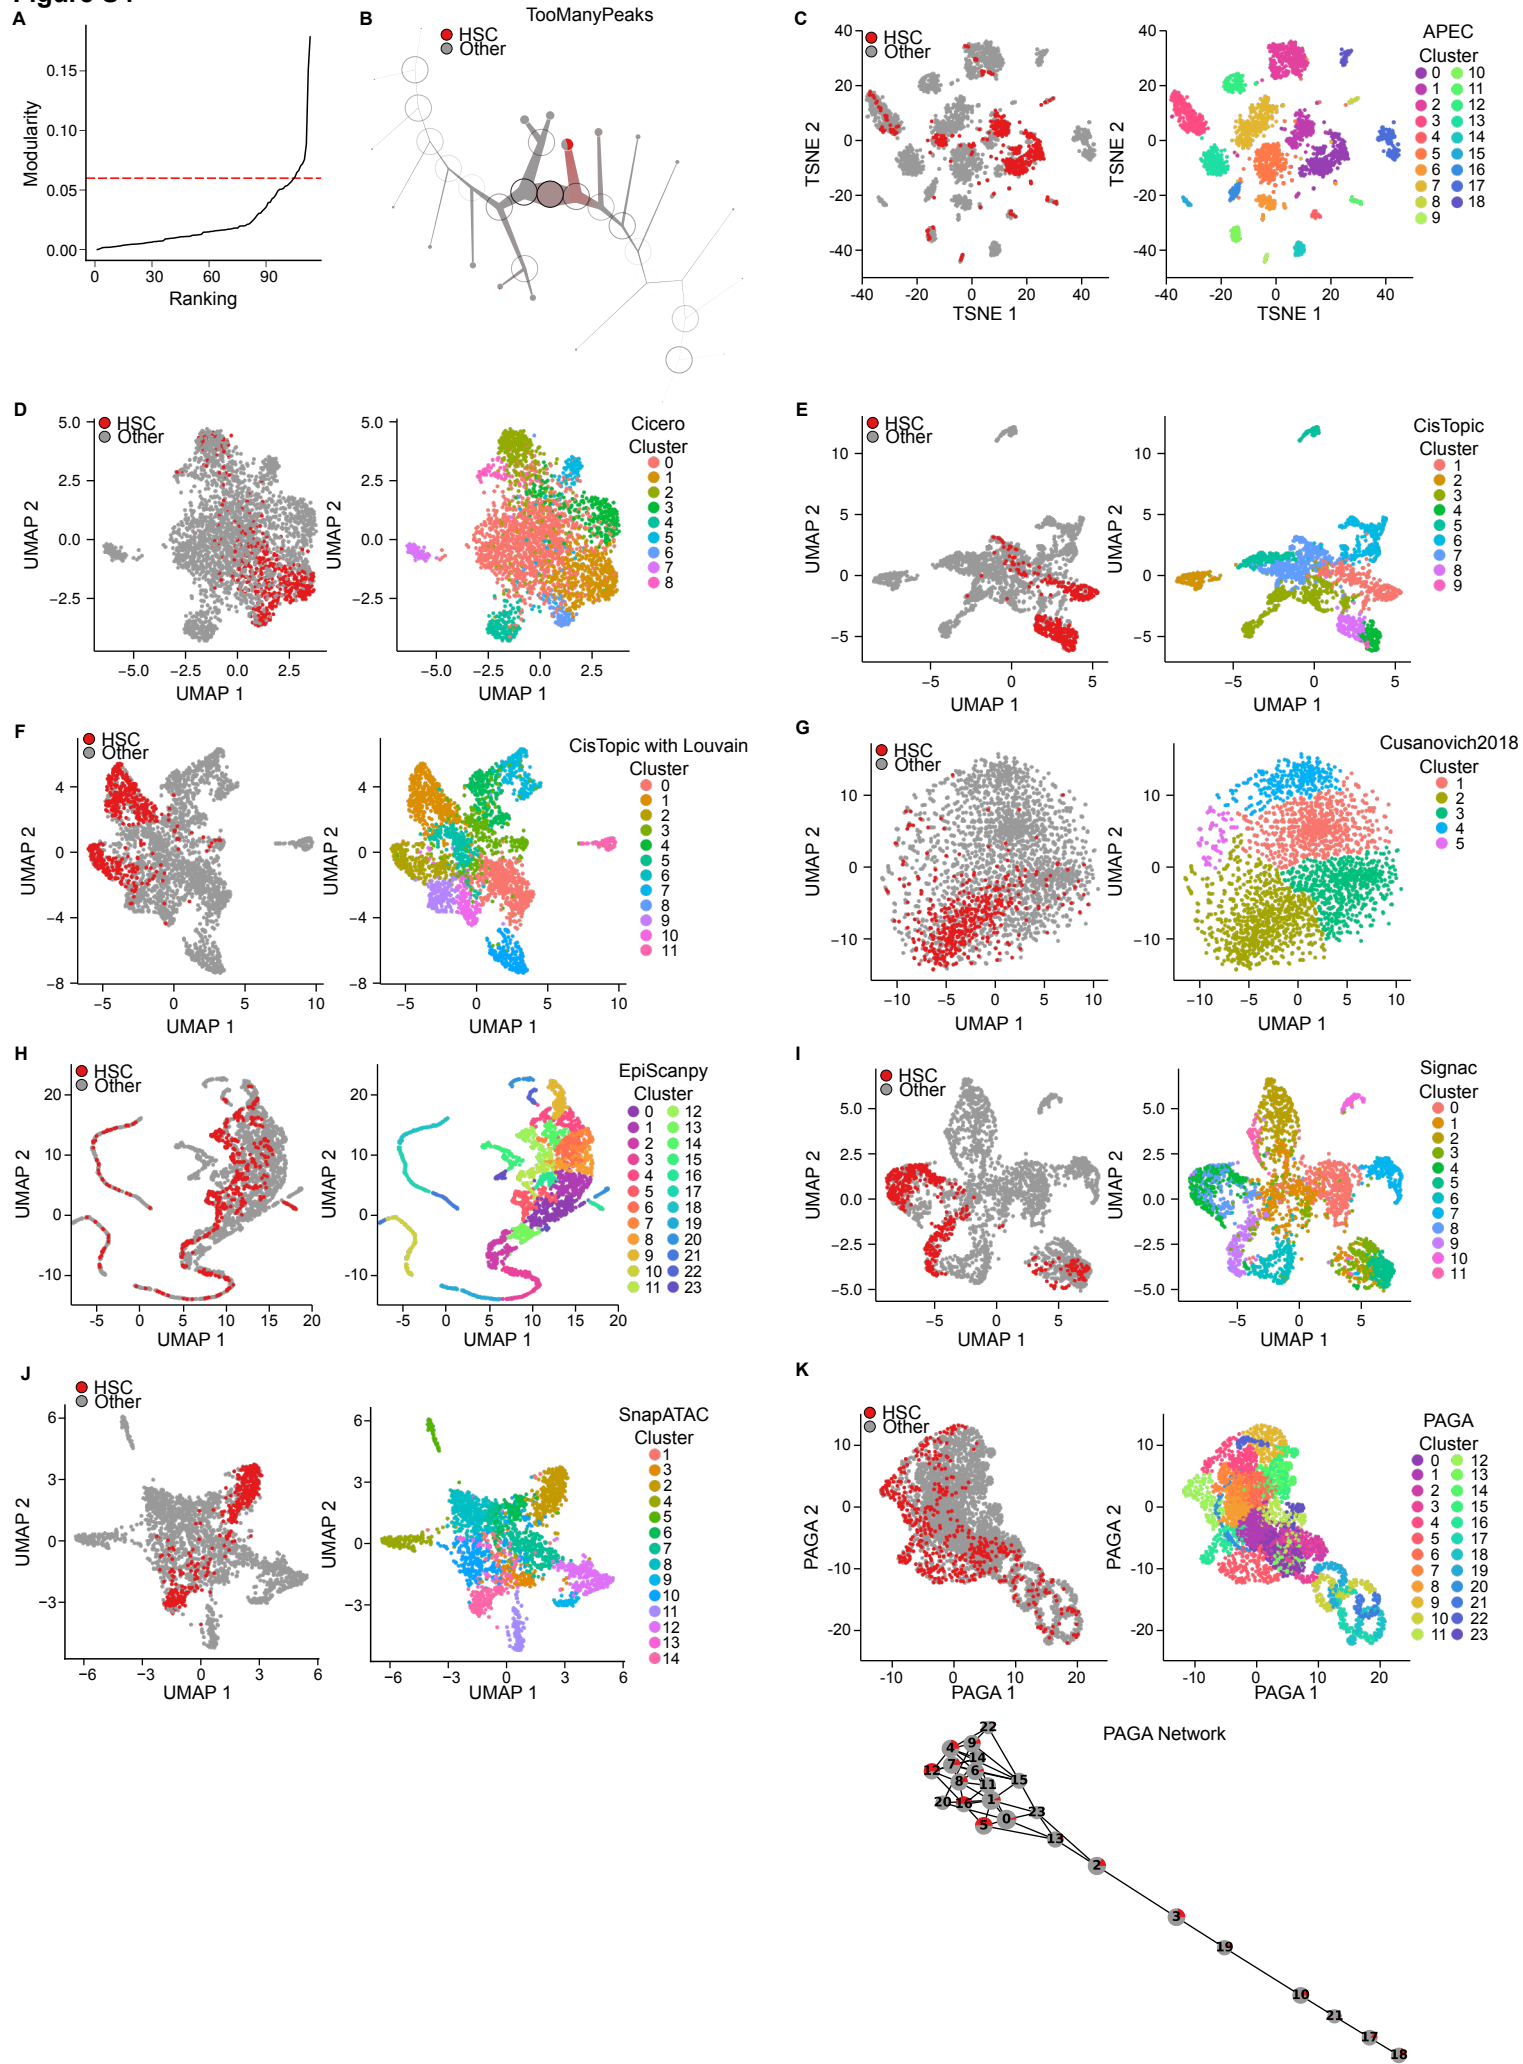



Figure S4: Comparing localization of hematopoietic stem cells (HSC) in the TooManyPeaks tree and UMAP or t-SNE outputs of human bone marrow profiled with Fluidigm C1 (Buenrostro et al., 2018). **(A)** The modularity-guided pruning threshold is set based on the beginning of the left plateau (marked by dashed red line) in the ranked modularity curve of the human bone marrow TooManyPeaks tree nodes ( $n = 2,954$  cells). **(B)** HSC cells are colored on the pruned TooManyPeaks tree per (A). At each bipartitioning, darker circle circumference represents higher modularity. **(C-K)** HSC cells are colored on UMAP or t-SNE outputs (red dots, left panel) generated by APEC (C), Cicero (D), CisTopic (E), CisTopic with Louvain (F), Cusanovich2018 (G), EpiScanpy (H), Signac (I), SnapATAC (J), and PAGA (K) initiated UMAP (top two panels) or PAGA network (bottom panels). Coordinates from the UMAP or t-SNE outputs (C-K, left panels) colored by each algorithm cluster label (C-K, right panels) fails to clearly localize HSC cells. For an unbiased comparison, each projection used the corresponding package's UMAP or t-SNE implementation. Moreover, default or suggested filters and parameters were used for all algorithms unless otherwise noted (see STAR Methods). Related to Figure 2.

**Figure S5****A**

Notch-mutated T-ALL cells (DND-41)

- Resistant-like parental
- Other

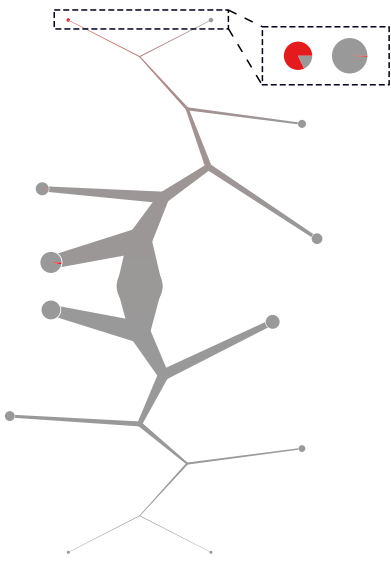**B**

Notch-mutated T-ALL cells (DND-41)

- GSI-resistant
- Parental

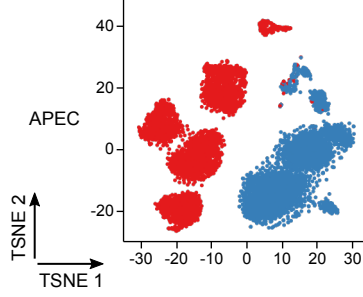

Notch-mutated T-ALL cells (DND-41)

- Resistant-like parental
- Other

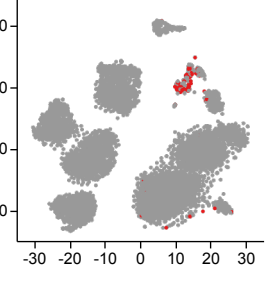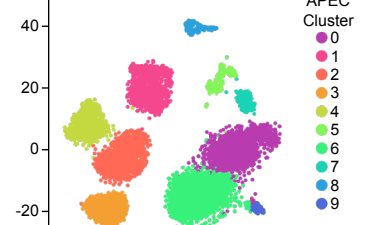**C**

Notch-mutated T-ALL cells (DND-41)

- GSI-resistant
- Parental

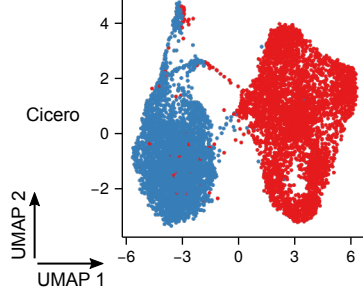

Notch-mutated T-ALL cells (DND-41)

- Resistant-like parental
- Other

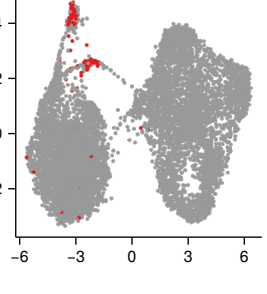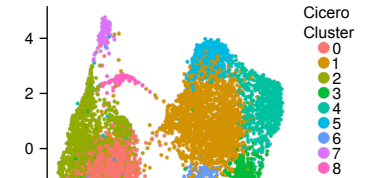**D**

Notch-mutated T-ALL cells (DND-41)

- GSI-resistant
- Parental

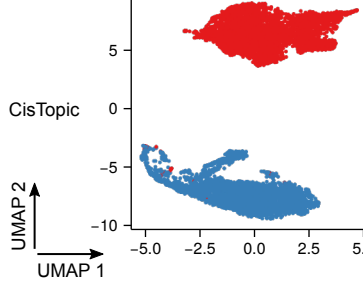

Notch-mutated T-ALL cells (DND-41)

- Resistant-like parental
- Other

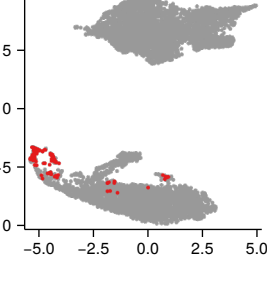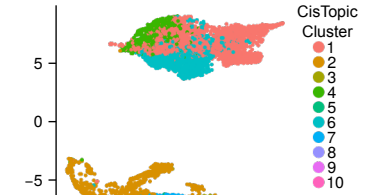**E**

Notch-mutated T-ALL cells (DND-41)

- GSI-resistant
- Parental

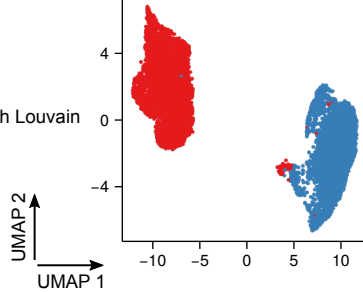

Notch-mutated T-ALL cells (DND-41)

- Resistant-like parental
- Other

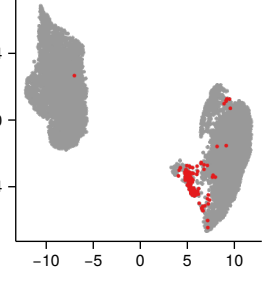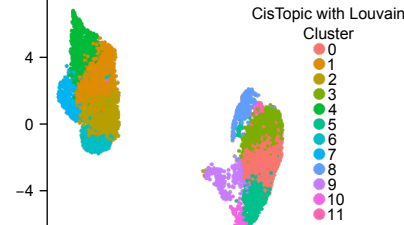

Figure S5: Comparisons of DND-41 T-ALL scATAC-seq data visualization. **(A)** The TooManyPeaks tree colored by resistant-like parental cells. **(B-E)** projection outputs of APEC (B), Cicero (C), CisTopic (D), and CisTopic with Louvain (E) colored by resistance status (left), resistant-like parental cells as defined by TooManyPeaks (middle), or algorithm cluster assignment (right) ( $n = 7,989$  cells). For an unbiased comparison, each projection used the corresponding package's UMAP or t-SNE implementation. Moreover, default or suggested filters and parameters were used for all algorithms unless otherwise noted (see STAR Methods). Related to Figure 3.

**Figure S6****A**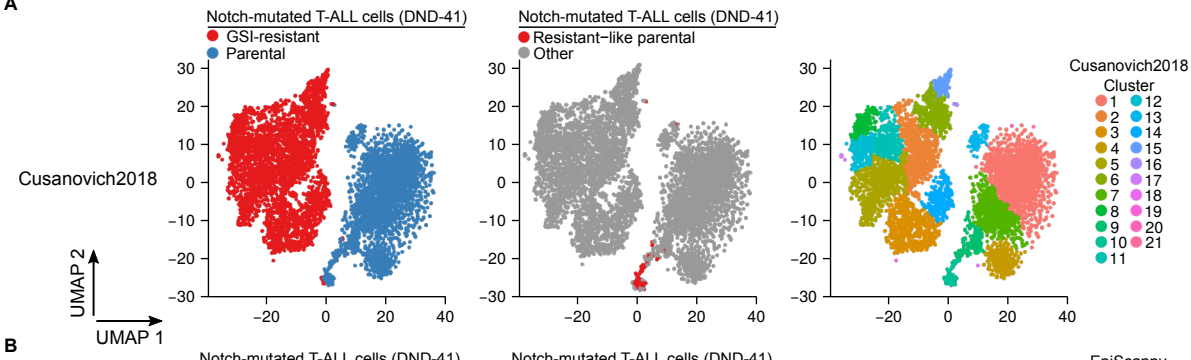**B**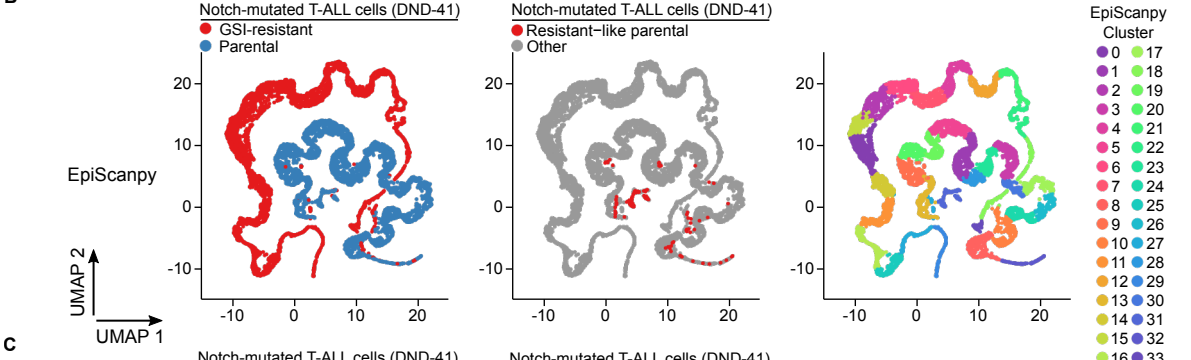**C**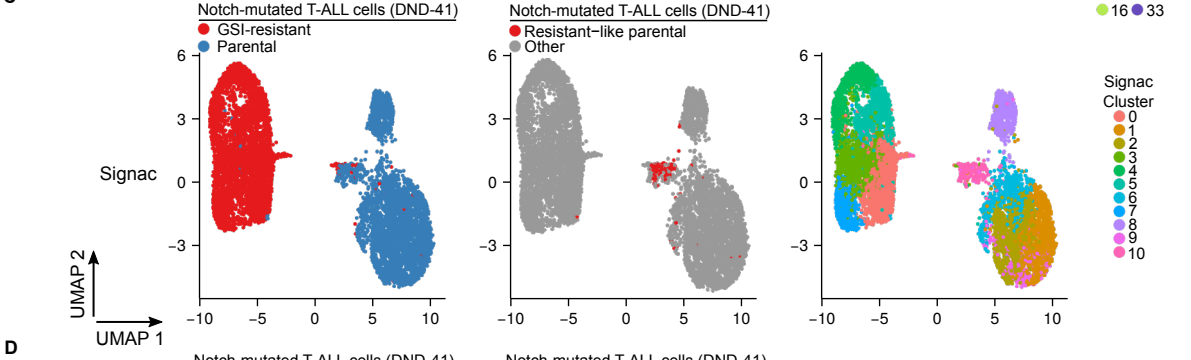**D**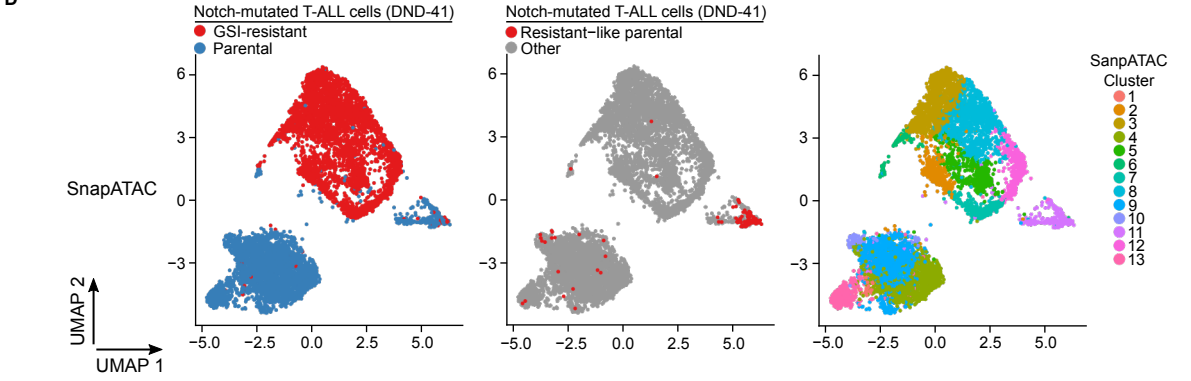**E**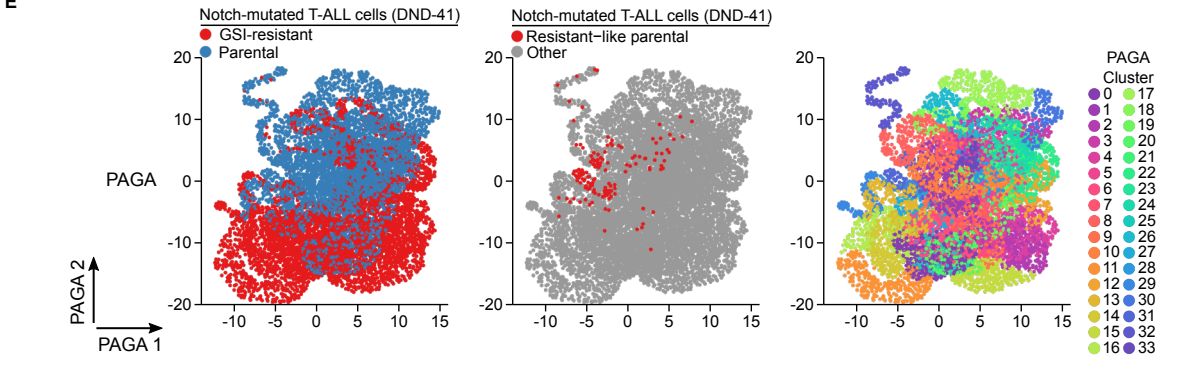

Figure S6: Comparisons of DND-41 T-ALL scATAC-seq data visualization, continued from Figure S5. **(A-D)** projection outputs of Cusanovich2018 (A), EpiScanpy (B), Signac (C), and SnapATAC (D) colored by resistance status (left), resistant-like parental cells as defined by TooManyPeaks (middle), or algorithm cluster assignment (right). **(E)** Projection output of PAGA-initiated UMAP colored by resistant status (left), resistant-like parental (second from left), cluster assignment (second from right). Right panel shows PAGA network colored by resistant-like parental cells ( $n = 7,989$  cells). For an unbiased comparison, each projection used the corresponding package's UMAP or t-SNE implementation. Moreover, default or suggested filters and parameters were used for all algorithms unless otherwise noted (see STAR Methods). Related to Figure 3.

**Figure S7**

**A**

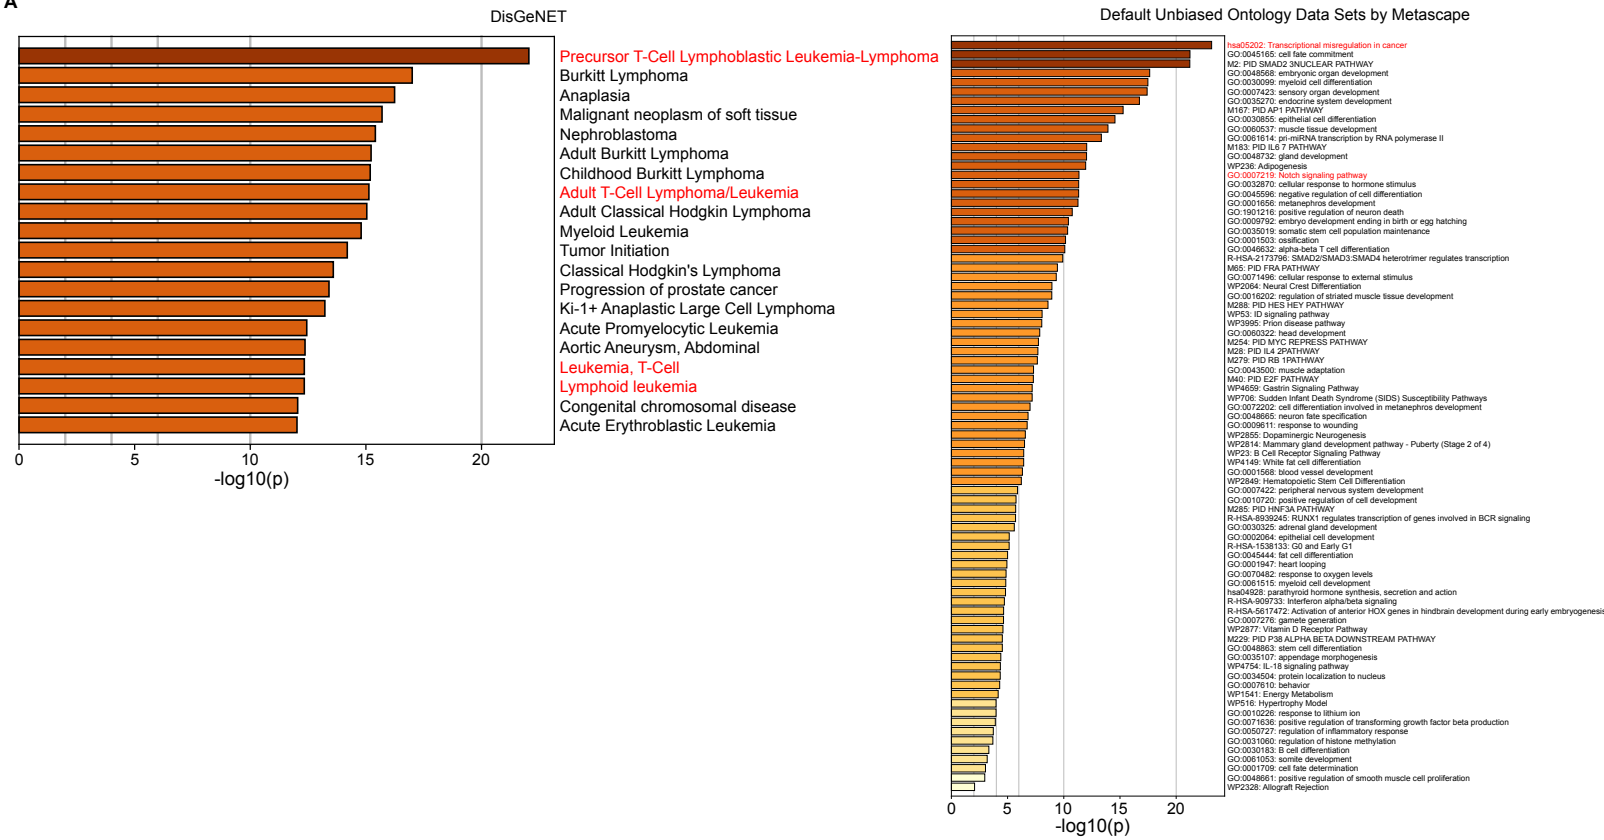

**B**

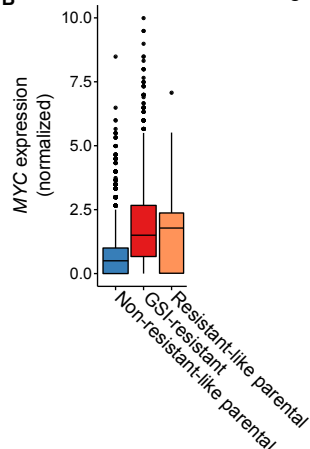

**C**

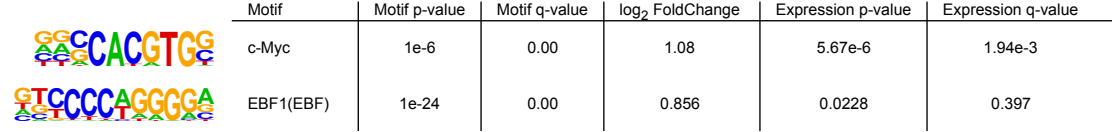

**D**

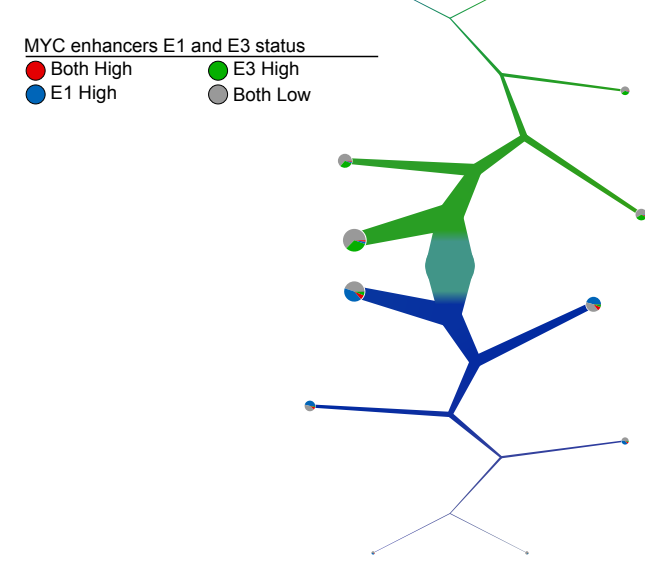

**E**

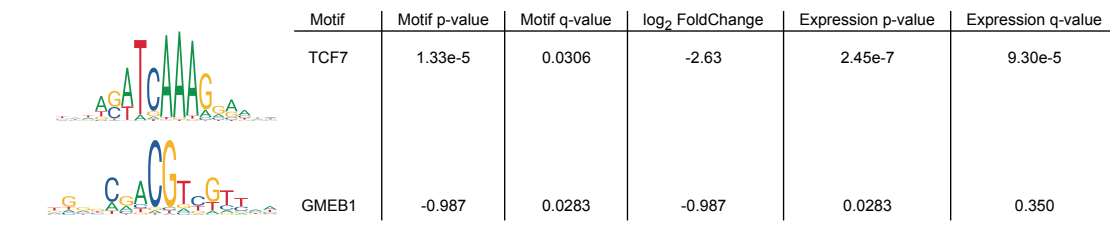

**F**

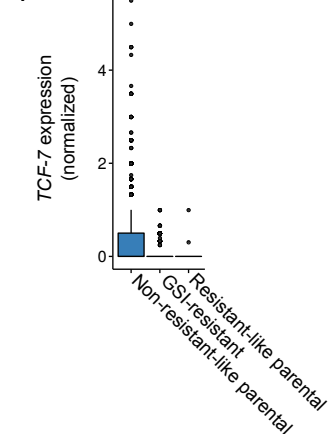

Figure S7: MYC and TCF-1 potentially bind differentially accessible elements of resistant-like parental cells. **(A)** Metascape analysis with DisGeNET database (left) and Ontology gene sets (right) showing that transcription factors with enriched binding motifs at the differential accessible elements of resistant-like parental cells are associated with pathways involved in T cell development and malignancies (highlighted in red, see STAR Methods). **(B)** MYC expression levels in GSI-resistant, resistant-like parental, and non-resistant-like parental cells identified in the TooManyCells tree ( $n = 7,371$  cells). **(C)** Transcription factors from HOMER with both significant upregulation and more accessible binding motif recognition sites in resistant-like parental compared to non-resistant-like parental cells. **(D)** TooManyPeaks tree of parental and GSI-resistant DND-41 cells as in Figure 3A showing the accessibility of the Notch-dependent and Notch-independent MYC enhancers ( $n = 7,989$  cells). **(E)** Transcription factors from JASPAR (Sandelin et al., 2004) with both significantly lower expression and accessible binding motif recognition sites at the *LINC00977*-proximal enhancer E2 of the resistant-like compared to non-resistant-like parental cells. **(f)** *TCF-7* expression levels in GSI-resistant, resistant-like parental, and non-resistant-like parental cells identified in the TooManyCells tree (Schwartz et al., 2020) ( $n = 7,371$  cells). Related to Figure 3.
